# Supplementary material
Source: Springer Nature journal article supplement (https://www.springermedizin.de/resource/supplementary/12943_2010_717_MOESM1_ESM.pdf/9554648)
Supplement: MOESM1 [file 9554648]

# Human Cancer

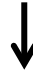

## Oncogenic Alterations “Omics” analyses

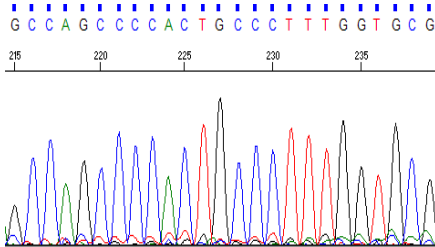

Mutation and copy number analyses

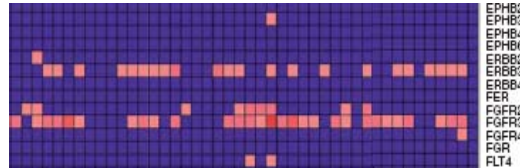

Proteomic studies

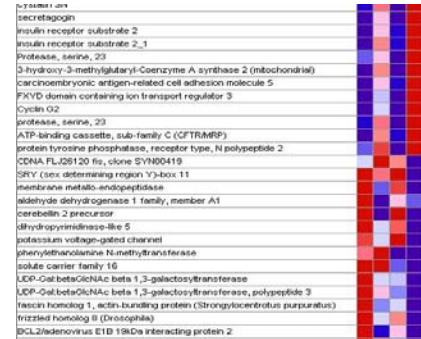

Transcriptomic studies

## Identification of molecular alterations

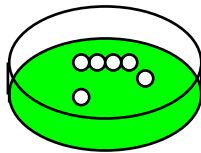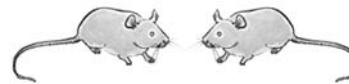

*In vitro and in vivo* validation  
(efficacy and safety)

## Targeted Drug Combinations

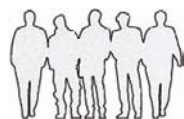

Clinical Studies
